# Supplementary material
Source: PubMed Central journal article supplement (PMC3193226)
Supplement: 1109095108_pnas.201109095SI.pdf [file 1109095108_pnas.201109095SI.pdf]

# Supporting Information

Yue et al. 10.1073/pnas.1109095108

## SI Materials and Methods

**Flow Cytometry.** Thymi and spleens were mashed into single-cell suspensions and erythrocytes were lysed. Liver cell suspensions were purified over a Percoll gradient (GE Healthcare). Briefly, liver cells were resuspended in a 20% Percoll solution and underlaid with 70% and 40% Percoll solutions. Hepatic mononuclear cells were isolated by centrifugation at  $900 \times g$  for 1 h at room temperature, collected at the 70% to 40% interface, and stained for FACS analysis. Cells were blocked with 10  $\mu$ g of Rat IgG antibody (Jackson ImmunoResearch) in PBS/5% FCS for 15 min on ice. Cells were then washed once with PBS/5% FCS and stained with fluorescently labeled antibodies (clones are indicated in parentheses) against B220 (RA3-6B2), CD1d (1B1), CD4 (L3T4), CD8 $\alpha$  (53-6.7), CD24 (M1/69), CD44 (IM7), CD45.2 (104), CD69 (H1.2F3), IL-2R $\beta$  (TM-b1), IL-4 (BVD6-24G2), IFN- $\gamma$  (XMG1.2), Mac-1 (M1/70), NK1.1 (PK136), TCR $\beta$  (H57-597), T-bet (eBio4B10), GATA-3 (L50-823), Bcl-x<sub>L</sub> (H5), and PLZF (D-9) purchased from eBioscience, BD Biosciences, Caltag, or Santa Cruz Biotechnology. Unloaded and PBS-57-loaded CD1d tetramers were provided by the National Institutes of Health Tetramer Facility. For intracellular staining, cells were first stained for surface markers, washed, and then fixed and permeabilized following manufacturer's instructions (Foxp3 Staining Buffer Set; eBioscience). Intracellular cytokine staining was performed using BD Cytotfix/Cytoperm solutions (BD Biosciences). Flow cytometric analysis and cell sorting were performed using a BD FACS LSR II or Aria (Beckton Dickinson). Results were analyzed using FlowJo software (TreeStar).

**Quantitative RT-PCR.** Total RNA was extracted with TRIzol solution (Invitrogen) and reverse transcription was carried out using the SuperScript-II-kit (Invitrogen). Quantitative RT-PCR was performed on the 7500 Fast Real-time PCR System of Applied Biosystems using the Roche probe library or nonspecific product detection (SYBR Green). Primer sequences and probe numbers for the genes analyzed using the Roche probe library are listed in the table below. Primer sequences for the genes analyzed by SYBR Green are from D'Cruz et al. (1).

| Genes                            | Primer sequence (5' to 3')       | Probe# |
|----------------------------------|----------------------------------|--------|
| <i>Va14-F</i>                    | GGA TGA CAC TGC CAC CTA CAT      | #75    |
| <i>Ja18-R</i>                    | GCT GAG TCC CAG CTC CAA          |        |
| <i>Ca-F</i>                      | ATG GAT TCC AAG AGC AAT GG       | #1     |
| <i>Ca-R</i>                      | GCA TCA CAG GGA ACG TCT G        |        |
| <i>Med1-F</i>                    | GGA CCT TTC TAA AAT GGC          | #97    |
| ( <i>cDNA</i> )                  | TAT TAT GT                       |        |
| <i>Med1-R</i>                    | CGG GGT GAG ATA ACC AAC AC       |        |
| ( <i>cDNA</i> )                  |                                  |        |
| <i>Med1-F</i>                    | ATA TAT GTG TGG GGG CCA GA       | #27    |
| ( <i>gDNA</i> )                  |                                  |        |
| <i>Med1-R</i>                    | TGC CTC AAG GGA CTA AAG CA       |        |
| ( <i>gDNA</i> )                  |                                  |        |
| <i>GATA-3-F</i>                  | GAC TCT TCC CAC CCA GCA          | #3     |
| <i>GATA-3-R</i>                  | CCC CGC AGT TCA CAC ACT          |        |
| <i>T-bet-F</i>                   | GAA AGG CAG AAG GCA GCA T        | #72    |
| <i>T-bet-R</i>                   | GAG CTT TAG CTT CCC AAA<br>TGA A |        |
| <i>ROR<math>\gamma</math>t-F</i> | GGT GAC CAG CTA CCA GAG GA       | #22    |
| <i>ROR<math>\gamma</math>t-R</i> | AGC TCC ATG AAG CCT GAA AG       |        |

| Genes                           | Primer sequence (5' to 3')    | Probe# |
|---------------------------------|-------------------------------|--------|
| <i>c-Myb-F</i>                  | TGT CAA CAG AGA ACG AGC TGA   | #40    |
| <i>c-Myb-R</i>                  | GCT GCA AGT GTG GTT CTG TG    |        |
| <i>HEB-F</i>                    | TGG GAA AAC GAG ACC AAC A     | #48    |
| <i>HEB-R</i>                    | CTC CAC GCT CAT CCA TAC CT    |        |
| <i>Id2-F</i>                    | GAC AGA ACC AGG CGT CCA       | #89    |
| <i>Id2-R</i>                    | AGC TCA GAA GGG AAT TCA GAT G |        |
| <i>VDR-F</i>                    | TGG ACA TTG GCA TGA TGA A     | #69    |
| <i>VDR-R</i>                    | GGC CTC AGA CTG TCC TTC AA    |        |
| <i>ZAP70-F</i>                  | CAG ACC GAC GGC AAG TTC       | #68    |
| <i>ZAP70-R</i>                  | CAT AGA CCA GGG ACA GTG CAT   |        |
| <i>SIP<math>\gamma</math>-F</i> | CGG TGT AGA CCC AGA GTC CT    | #66    |
| <i>SIP<math>\gamma</math>-R</i> | AGC TTT TCC TTG GCT GGA G     |        |
| <i>Itk-F</i>                    | GGA AAA AGC TTG TGT CAT CCA   | #71    |
| <i>Itk-R</i>                    | CCA AAG TCG GAC ACC TTG AT    |        |
| <i>Bcl-2-F</i>                  | GTA CCT GAA CCG GCA TCT G     | #75    |
| <i>Bcl-2-R</i>                  | GGG GCC ATA TAG TTC CAC AA    |        |
| <i>Bcl-x<sub>L</sub>-F</i>      | CCT TGG ATC CAG GAG AAC G     | #66    |
| <i>Bcl-x<sub>L</sub>-R</i>      | CAG GAA CCA GCG GTT GAA       |        |

**Generation of Bone-Marrow Chimeras.** Recipient CD45.1<sup>+</sup> congenic mice were subjected to 950 rads irradiation 1 d before transfer. Bone-marrow cells were harvested from the tibiae and femurs of donor mice.  $1 \times 10^7$  cells were injected intravenously into the recipient mice. The resulting chimeras were analyzed 10 to 12 wk after bone marrow reconstitution.

**In Vivo  $\alpha$ -GalCer Stimulation.** Two micrograms of  $\alpha$ -GalCer in 100  $\mu$ L PBS was intravenously injected into mice. Mice were bled at 2 and 5 h after injection. Blood was allowed to clot and the serum was separated from the clots. IFN- $\gamma$  and IL-4 production were measured by ELISA following the manufacturer's instructions (ELISA Ready-SET-Go; eBioscience). For the secondary activation of B cells, T cells, and macrophages, splenocytes were collected 5 h after injection and stained with antibodies against CD69, B220, CD8 $\alpha$ , and Mac-1.

**BrdU-Labeling Assay.** Mice were injected intraperitoneally with 1 mg BrdU. Twenty-four hours later, thymi were isolated and mashed into single-cell suspensions. Cells were first stained for cell surface markers. After fixation and permeabilization using BD Cytotfix/Cytoperm solutions (BD Biosciences), cells were treated with 300  $\mu$ g/mL DNase for 1 h at 37  $^{\circ}$ C. BrdU incorporation was detected using a FITC labeled anti-BrdU antibody (eBioscience).

**Annexin V Staining.** Freshly isolated total thymocytes were cultured in complete RPMI medium in vitro. Samples were taken at various time points and stained for cell surface markers. Next,  $1 \times 10^6$  cells were resuspended in 1 mL Annexin V binding buffer. Then, 100  $\mu$ L of resulting cell suspension was incubated with 5  $\mu$ L APC-labeled Annexin V (eBioscience) for 15 min at room temperature in the dark. Next, 400  $\mu$ L Annexin V binding buffer was added and the cells were analyzed by flow cytometry within 1 h.

**Antigen Presentation Assay.** For the antigen presentation assay,  $1 \times 10^6$  thymocytes isolated from Med1<sup>+/-</sup> and Med1<sup>-/-</sup> mice were incubated with  $5 \times 10^4$  NKT cell hybridoma DN32.D3 (kindly provided by A. Bendelac, University of Chicago, Chicago, IL)

with or without  $\alpha$ -GalCer (100 ng/mL), as previously described (2, 3). Supernatants were collected 24 h later and IL-2 pro-

duction was assayed by ELISA according to the manufacturer's instructions (eBioscience).

1. D'Cruz LM, Knell J, Fujimoto JK, Goldrath AW (2010) An essential role for the transcription factor HEB in thymocyte survival, Tcr $\alpha$  rearrangement and the development of natural killer T cells. *Nat Immunol* 11:240–249.
2. Egawa T, et al. (2005) Genetic evidence supporting selection of the Valpha14i NKT cell lineage from double-positive thymocyte precursors. *Immunity* 22:705–716.

3. Lazarevic V, et al. (2009) The gene encoding early growth response 2, a target of the transcription factor NFAT, is required for the development and maturation of natural killer T cells. *Nat Immunol* 10:306–313.

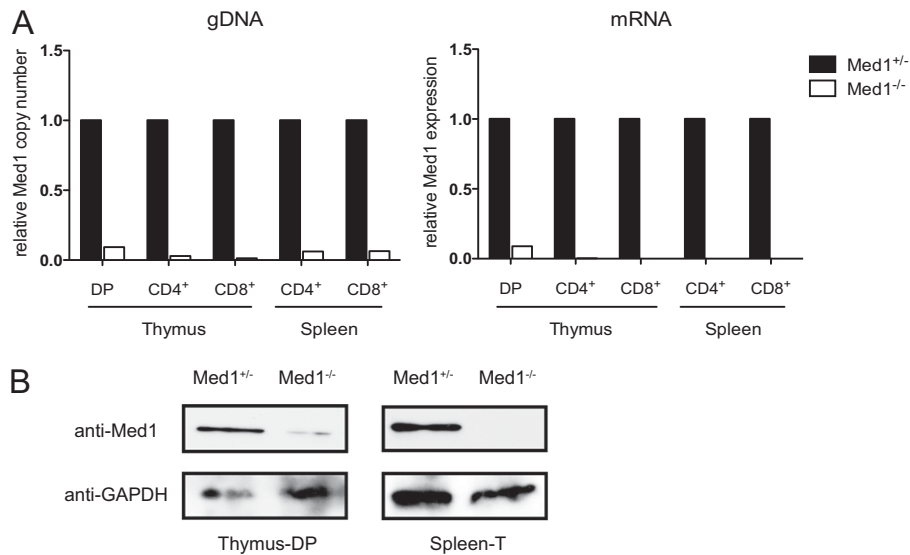

**Fig. S1.** Quantitative real-time PCR and Western blot analysis of Med1 level in T-cell lineage. (A) Med1 level by sorted thymocyte and splenocyte subpopulations was determined by qRT-PCR at both gDNA (Left, normalized to a control genomic sequence: –106 kb upstream of the GATA-1 locus) and mRNA (Right, normalized to the expression of TATA binding protein: TBP) level. (B) Western blot was performed on sorted CD4<sup>+</sup>CD8<sup>+</sup> double-positive (DP) thymocytes and TCR $\beta$ <sup>+</sup> splenic T cells using Med1-specific antibody; GAPDH was used as a loading control.







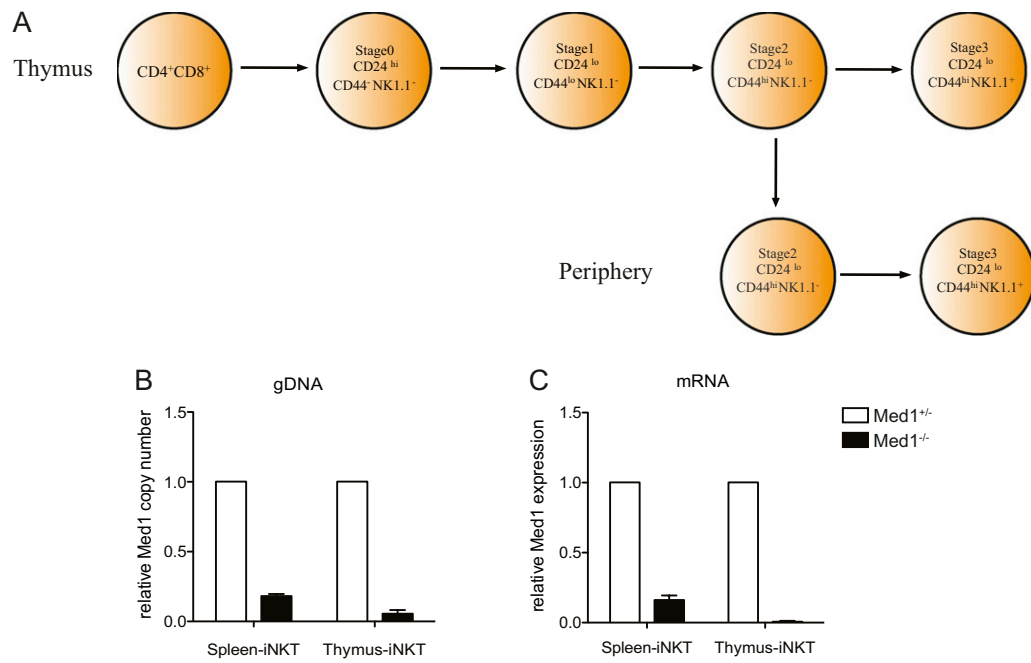

**Fig. S6.** (A) Schematic description of iNKT cell development and maturation: iNKT cells are derived from CD4<sup>+</sup>CD8<sup>+</sup> DP thymocytes and progress through four distinct developmental stages, from stages 0 to 3, defined by the expression of CD24, CD44, and NK1.1. Stage 2 cells can emigrate from the thymus and mature in the periphery. (B and C) Med1 was efficiently deleted in splenic and thymic iNKT cells in Med1<sup>-/-</sup> mice: CD1d-tetramer<sup>+</sup> iNKT cells from Med1<sup>+/+</sup> or Med1<sup>-/-</sup> mice were sorted and Med1 deletion efficiency was analyzed at both gDNA (normalized to a control genomic sequence: -106 kb upstream of the GATA-1 locus) and mRNA (normalized to the expression of TBP) level by quantitative RT-PCR. Results are shown as mean ± SEM from three independent experiments.

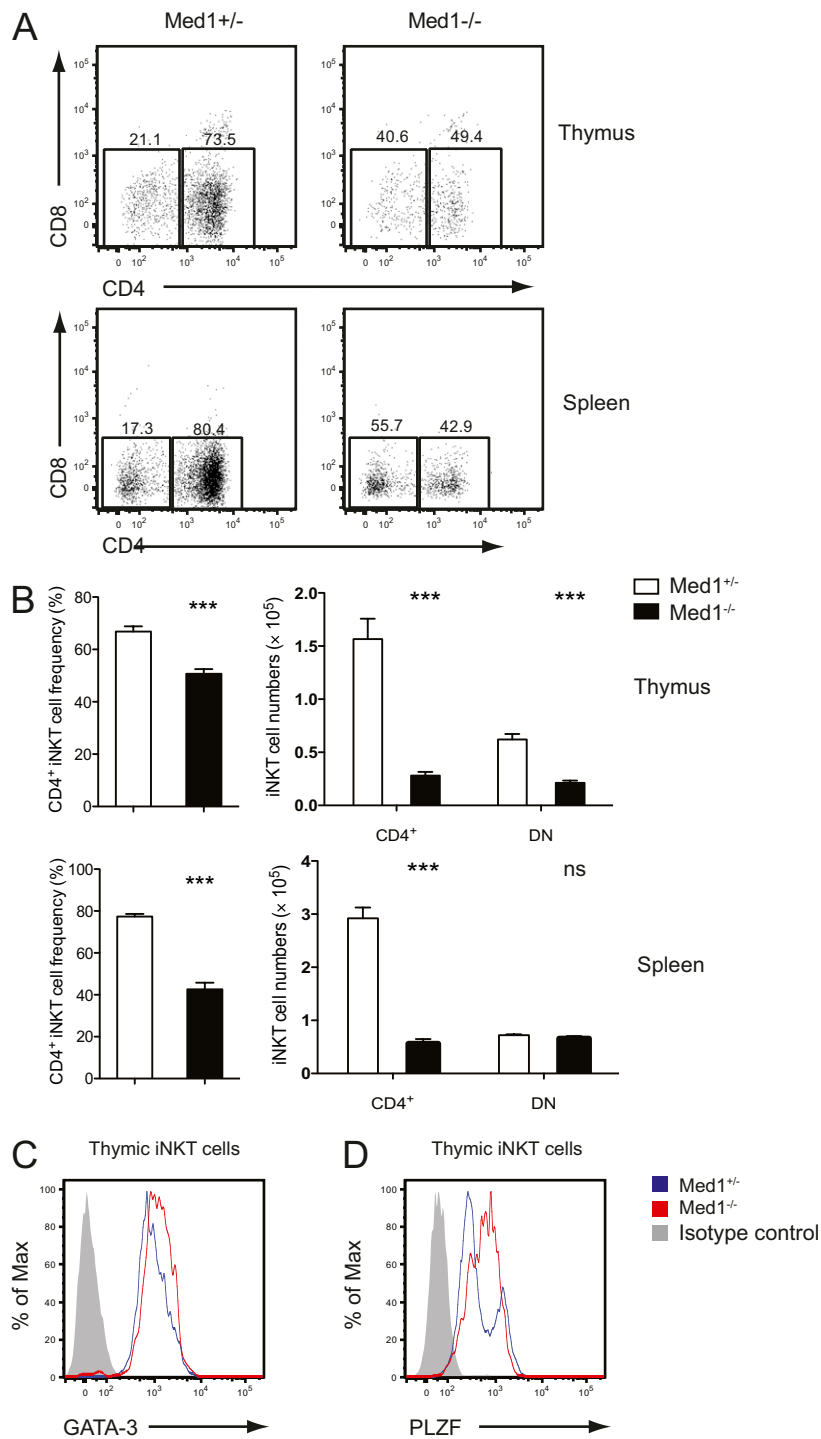

**Fig. S7.** Analysis of the subset composition of iNKT cells in the absence of Med1. (A) Expression of CD4 and CD8 $\alpha$  by thymic (Upper) and splenic (Lower) CD1d-tetramer<sup>+</sup> iNKT cells from Med1<sup>+/-</sup> or Med1<sup>-/-</sup> mice were analyzed by flow cytometry to define the CD4<sup>+</sup> and DN (double-negative) subsets. (B) Statistical analysis of the percentage (Left) and absolute numbers (Right) of CD4<sup>+</sup> and DN subsets of thymic and splenic CD1d-tetramer<sup>+</sup> iNKT cells. Six mice of each genotype were analyzed. \**P* < 0.05, \*\**P* < 0.01, \*\*\**P* < 0.001, ns: not significant (unpaired two-tailed *t* test). (C and D) The expression of GATA-3 and PLZF by thymic CD1d-tetramer<sup>+</sup> iNKT cells from Med1<sup>+/-</sup> or Med1<sup>-/-</sup> mice was analyzed by intracellular FACS staining (blue: Med1<sup>+/-</sup> mice; red: Med1<sup>-/-</sup> mice; gray solid: isotype control). Data are representative of two independent experiments.

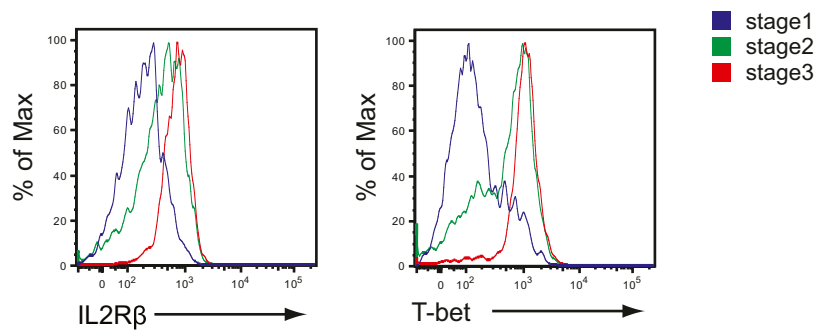

**Fig. 58.** Expression pattern of IL-2R $\beta$  and T-bet in thymic iNKT cells from Med1<sup>+/-</sup> mice at different developmental stages. The expression of IL-2R $\beta$  (Left) and T-bet (Right) in thymic CD1d-tetramer<sup>+</sup> iNKT cells is up-regulated when the cells progress from stage 1 to stage 3 (blue: stage 1 cells; green: stage 2 cells; red: stage 3 cells). Data are representative of five independent experiments.

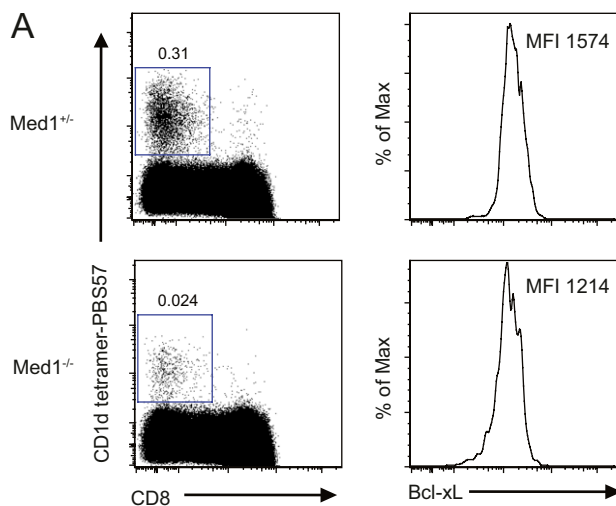

**B** CD4<sup>+</sup>CD8<sup>+</sup> thymocytes

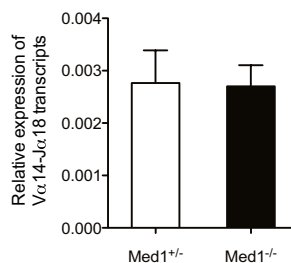

**Fig. 59.** (A) Analysis of Bcl-x<sub>L</sub> expression by thymic iNKT cells: The expression of Bcl-x<sub>L</sub> by thymic CD1d-tetramer<sup>+</sup> iNKT cells from Med1<sup>+/-</sup> (Upper) or Med1<sup>-/-</sup> mice (Lower) was analyzed by intracellular FACS staining. The geometric mean fluorescent intensity (MFI) was shown. Data are representative of two independent experiments. (B) Quantitative real-time PCR analysis of V $\alpha$ 14-J $\alpha$ 18 transcripts in sorted CD4<sup>+</sup>CD8<sup>+</sup> DP thymocytes from Med1<sup>+/-</sup> or Med1<sup>-/-</sup> mice. Level of V $\alpha$ 14-J $\alpha$ 18 transcripts was normalized to the quantity of C $\alpha$  transcripts. Results are shown as mean  $\pm$  SEM from three independent experiments.
